# Supplementary material for: Automated detection of harm in healthcare with information technology: a systematic review
Source: HighWire-hosted journal article supplement (doi:10.1136/qshc.2009.033027), 2010-07-29
Supplement: appendix_033027.pdf [file appendix_033027.pdf]

| Reference                              | Patient Sample and Time Frame         | Sampling Strategy                                             | Specialty                                          | Events Identified                                                                                 | Automated Event Dataset Sample Size                    | Comparison Event Dataset Sample Size      | Strategy of Event Identification                                           | Method of Automated Event Identification | Degree of Automation                                                                              | Source of Automated Event Data                                                             | Source of Comparison Event Data                                 | Method of Comparison Event Identification                                            | Comments                                                                                                                                                                                                                                                                                                                                                                                                                                                                         |
|----------------------------------------|---------------------------------------|---------------------------------------------------------------|----------------------------------------------------|---------------------------------------------------------------------------------------------------|--------------------------------------------------------|-------------------------------------------|----------------------------------------------------------------------------|------------------------------------------|---------------------------------------------------------------------------------------------------|--------------------------------------------------------------------------------------------|-----------------------------------------------------------------|--------------------------------------------------------------------------------------|----------------------------------------------------------------------------------------------------------------------------------------------------------------------------------------------------------------------------------------------------------------------------------------------------------------------------------------------------------------------------------------------------------------------------------------------------------------------------------|
| <b>Complications Screening Program</b> |                                       |                                                               |                                                    |                                                                                                   |                                                        |                                           |                                                                            |                                          |                                                                                                   |                                                                                            |                                                                 |                                                                                      |                                                                                                                                                                                                                                                                                                                                                                                                                                                                                  |
| Lawthers, 2000 [10]                    | Adults 1994                           | Combination of random sample and risk stratification sampling | Major surgical and medical risk groups             | Adverse events: "complications of hospital care"                                                  | 1298 cases: 634 California, 664 Connecticut            | 1298 cases                                | Complications Screening Program                                            | Field Defined                            | Partial                                                                                           | ICD-9 CM codes                                                                             | Medical record and ICD -9 CM codes                              | Chart review, not otherwise specified                                                | Used ICD-9 CM codes to screen for complications. When code was triggered, computer algorithm tested for specific qualifications to categorize the complication further. This study used Medicare 1994 MEDPRO database claim codes and a 2 stage review to compare the codes to manual review. Study designed with chart review after computerized detection. Number of cases per screen were relatively small. Reviewers unblinded to trigger codes.                             |
| Weingart, 2000 [9]                     | Geriatrics 1994                       | Random                                                        | Unknown                                            | Adverse Event: complications of care including surgical complications, infections, falls, ADE etc | 1025 Medicare beneficiaries                            | NA                                        | Complications Screening Program                                            | Field Defined                            | Partial                                                                                           | Administrative Data                                                                        | NA                                                              | NA                                                                                   | Used administrative data from Medicare patients in California and Connecticut in 1994. Hospitals stratified by expected complication rates, then randomly selected cases flagged with surgical and medical complications as well as unflagged controls were collected. Cases subjected to peer review physician judgments to attempt to validate the CSP.                                                                                                                        |
| Iezzoni, 1992 [8]                      | Adults 1988                           | Unknown                                                       | Gen Med and Gen Surg (excluded obstetric patients) | Adverse events                                                                                    | 100 discharge abstracts. Original sample size unknown. | 100 standard hospital discharge abstracts | Appears to be Complications Screening Program (CSP) or a precursor to CSP. | Field Defined                            | Partial                                                                                           | Discharge summary; ICD-9 diagnosis and procedure codes                                     | Discharge summary and administrative data                       | Chart review, not otherwise specified                                                | Computerized screening based on patient age, sex, ICD-9-CM diagnosis and procedure codes, DRG, and number of days from admission to principal major surgeries or procedures. 27 quality screens used to identify potential adverse events. Physician reviewers only had access to administrative data and had poor inter-rater reliability.                                                                                                                                      |
| <b>Computer Algorithms</b>             |                                       |                                                               |                                                    |                                                                                                   |                                                        |                                           |                                                                            |                                          |                                                                                                   |                                                                                            |                                                                 |                                                                                      |                                                                                                                                                                                                                                                                                                                                                                                                                                                                                  |
| Nebeker, 2007 [18]                     | Adults 2001 and 2003                  | Random                                                        | Unknown                                            | Adverse drug events                                                                               | 3987 admissions                                        | 3987 admissions                           | Computer algorithms                                                        | Field Defined                            | Chart review for study, however unclear whether strategy aims to be fully or partially automated. | ICD-9 CM codes                                                                             | Medical record                                                  | Gold standard chart review                                                           | Study used Houglund, 2006 <sup>28</sup> methodology to specifically apply HOCTA (hierarchically optimal classification tree analysis) to administrative data to develop surveillance rules for the identification of ADEs manifesting as either bleeding or delirium. Specifically interested in creating models using this type of nonlinear statistical method for 2 particular ADEs. Model's validation was limited and may be overfit. Requires expert computer programming. |
| Trick, 2004 [20]                       | Adults 9/1/01-2/28/02                 | Sequential                                                    | Unknown                                            | Infection                                                                                         | 135 positive blood cultures                            | 144 positive blood cultures               | Computer algorithm                                                         | Field Defined                            | Full and Partial                                                                                  | Medical record, lab database, pharmacy database, radiology database, microbiology          | Medical record, lab database, pharmacy, radiology, microbiology | Gold standard chart review                                                           | Comparison of manual and computer assisted bloodstream central venous catheter infection surveillance using data from two hospitals. Different computer algorithms developed for full or partial automation were tested. Findings may not generalize to other institutions.                                                                                                                                                                                                      |
| Benson, 2000 [19]                      | Patients aged 14 years and older 1998 | Sequential                                                    | Patients under anesthesia                          | Adverse Event                                                                                     | 16,019 surgical procedures                             | 16,019 surgical procedures                | Computer algorithm: structure query language                               | Field Defined                            | Full                                                                                              | Online anesthesia documenting software (Anesthesia Information Management System, or AIMS) | Anesthesia record                                               | Other: manually recorded information during perioperative period by anesthesiologist | AIMS database queried for 9 common perioperative adverse events with structured query language (SQL) queries.                                                                                                                                                                                                                                                                                                                                                                    |

|                                                           |                           |            |                                                                         |                               |                                       |                                    |                               |                             |         |                                                                                                                                         |                                                                              |                                                                                   |                                                                                                                                                                                                                                                                                                                                                                                                                                                                                                                                                                                                                                                                                                                                                                                                                               |
|-----------------------------------------------------------|---------------------------|------------|-------------------------------------------------------------------------|-------------------------------|---------------------------------------|------------------------------------|-------------------------------|-----------------------------|---------|-----------------------------------------------------------------------------------------------------------------------------------------|------------------------------------------------------------------------------|-----------------------------------------------------------------------------------|-------------------------------------------------------------------------------------------------------------------------------------------------------------------------------------------------------------------------------------------------------------------------------------------------------------------------------------------------------------------------------------------------------------------------------------------------------------------------------------------------------------------------------------------------------------------------------------------------------------------------------------------------------------------------------------------------------------------------------------------------------------------------------------------------------------------------------|
| Brown, 2000 [21]                                          | Unknown 7/1/99 to 9/30/99 | Sequential | Unknown                                                                 | Adverse drug events           | 1643 RADARx alerts over study period  | Unknown                            | Computer Algorithms: RADARx   | Field Defined               | Partial | Lab database, pharmacy database, demographics, diagnoses and procedures                                                                 | Unknown                                                                      | Other: "traditional methods", not otherwise specified                             | RADARx (Recognizing, Assessing, and Documenting Adverse Rx events) is a VA software program integrating computerized adverse drug event (ADE) screening, probability assessment, documentation and reporting capabilities. Study evaluated patient data every four hours for possible ADEs, generated and stored alerts. Clinical pharmacists reviewed alerts daily, documented findings, and contacted clinicians in real-time. Used Naranjo algorithm to assess causality. Major source of algorithm rules from Jha, 1998 <sup>30</sup> . Manual review of 8-20 alerts daily costed 10-30 minutes daily. RADARx used 12 seconds of CPU time every 4 hours. Initially involved 30 minutes installation time and 1-2 hours to run mapping tools. RADARx rules designed as screens and meant to be sensitive and not specific. |
| <b>HELP: Health Evaluation through Logical Processing</b> |                           |            |                                                                         |                               |                                       |                                    |                               |                             |         |                                                                                                                                         |                                                                              |                                                                                   |                                                                                                                                                                                                                                                                                                                                                                                                                                                                                                                                                                                                                                                                                                                                                                                                                               |
| Samore, 2004 [13]                                         | Adults 1/00 -9/00         | Sequential | Other: all "regular and short stay" pts except obstetrics and neonates. | Adverse medical device events | 20,441 pts                            | 20,441 pts                         | HELP and computer based flags | Field Defined               | Partial | Medical record, lab database, pharmacy database, radiology database, billing data, ICD-9 CM codes - HELP integrates multiple interfaces | Voluntary reporting and ICD-9 CM codes                                       | Voluntary reporting and ICD-9 discharge codes                                     | Automated surveillance designed to detect device related patient harm (AMDE) based on existing HELP adverse drug event detection methods. 7 categories of automated flags based on common complications and availability of electronic data, then flagged charts reviewed manually. AMDE definition includes all definitions of harm such as infection, bleeding, dropping oxygen saturations etc.                                                                                                                                                                                                                                                                                                                                                                                                                            |
| Classen, 1991 [11]                                        | Adults 5/1/89 to 10/31/90 | Sequential | Obstetrics, ICU, Gen Med and Gen Surg                                   | Adverse drug events           | 36,653 patients                       | NA                                 | HELP                          | Field Defined               | Partial | Medical record, lab database, pharmacy database                                                                                         | Voluntary reporting                                                          | voluntary reporting and stimulated voluntary reporting                            | Results from the HELP system at the LDS Hospital, Utah using highly integrated electronic medical record. Daily computerized ADE report generated from automated surveillance of the medical record for defined signals, followed by clinical pharmacist review.                                                                                                                                                                                                                                                                                                                                                                                                                                                                                                                                                              |
| Evans, 1991 [12]                                          | Unknown 5/89-5/90         | Sequential | Unknown                                                                 | Adverse drug events           | 23,297 patients                       | 25,142 patients from 5/1/88-5/1/89 | HELP                          | Field Defined               | Partial | Medical record, lab database, pharmacy database, demographics                                                                           | Voluntary reporting                                                          | voluntary reporting                                                               | Results from HELP information system at LDS hospital in Utah. ADE monitor program generated daily list of alerts using automated signals. Signaled charts were reviewed by trained nurse and pharmacist to verify ADE. Based on Classen 1991 <sup>8</sup> rules/program.                                                                                                                                                                                                                                                                                                                                                                                                                                                                                                                                                      |
| Evans, 1986 [14]                                          | Unknown 2/84 to 3/84      | Sequential | Unknown                                                                 | Infection                     | 4,679 patients; 217 with suspected NI | 217 patients with suspected NI     | HELP and other                | Field Defined               | Partial | Medical record, lab database, microbiology test results                                                                                 | Medical record                                                               | Chart review, not otherwise specified                                             | Study evaluated computer screening versus infection control practitioner screening, both followed by chart review. The overall computerized system looked at patients with 1) hospital-acquired infections, 2) who were not receiving antibiotics to which their pathogens were susceptible, 3) who could be receiving less expensive antibiotics, or 4) who were receiving prophylactic antibiotics for too long. Time required: 8.6 hours to complete computerized report of unverified alerts, compared to 138 hours for infection control practitioners. Physician review took 15 minutes per chart to verify alerts.                                                                                                                                                                                                     |
| <b>Natural Language Processing</b>                        |                           |            |                                                                         |                               |                                       |                                    |                               |                             |         |                                                                                                                                         |                                                                              |                                                                                   |                                                                                                                                                                                                                                                                                                                                                                                                                                                                                                                                                                                                                                                                                                                                                                                                                               |
| Haas, 2005 [49]                                           | Children 3/1/01-1/31/03   | Sequential | NICU                                                                    | Pneumonia                     | 1692 patients                         | 1692 patients                      | Natural Language Processing   | Natural Language Processing | Full    | Radiology database: specifically chest x-rays                                                                                           | Radiology database, medical record, microbiology, interviews with caregivers | Prospective infection surveillance by experienced infection control professional. | Designed to use chest x-rays from two neonatal intensive care units to detect nosocomial pneumonia in neonates. NLP program screened chest x ray reports and flagged reports indicative of pneumonia according to rules derived from National Nosocomial Infection Surveillance System.                                                                                                                                                                                                                                                                                                                                                                                                                                                                                                                                       |

|                                                            |                                     |                                                                                        |                                                              |                                                                          |                                                                             |                                                                                    |                                                                                        |                             |         |                                                                                                             |                                                                                                                                |                            |                                                                                                                                                                                                                                                                                                                                                                                                                                   |
|------------------------------------------------------------|-------------------------------------|----------------------------------------------------------------------------------------|--------------------------------------------------------------|--------------------------------------------------------------------------|-----------------------------------------------------------------------------|------------------------------------------------------------------------------------|----------------------------------------------------------------------------------------|-----------------------------|---------|-------------------------------------------------------------------------------------------------------------|--------------------------------------------------------------------------------------------------------------------------------|----------------------------|-----------------------------------------------------------------------------------------------------------------------------------------------------------------------------------------------------------------------------------------------------------------------------------------------------------------------------------------------------------------------------------------------------------------------------------|
| Melton, 2005 [48]                                          | Unknown 1996-2000                   | Random sampling and Sequential (all electronic discharge summaries during study years) | Unknown                                                      | Adverse events: specifically 45 NYPORTS event types.                     | 1000 charts randomly sampled and then 57,422 electronic discharge summaries | 1000 charts (random sample during study period)                                    | Natural Language Processing                                                            | Natural Language Processing | Partial | Discharge summaries                                                                                         | Full electronic chart and combined electronic chart and paper chart for a subset of 100 pts.                                   | Gold standard chart review | Natural Language Processing system (MedLEE) to identify 45 NY Patient Occurrence Reporting and Tracking System event types. Discharge summaries converted to coded form then tested. Chart review by physician and independent informatician of random sample of 1000 charts to assess performance of NLP program. Results biased towards patients with electronic discharge summaries. This method is technologically intensive. |
| <b>Patient Safety Indicators</b>                           |                                     |                                                                                        |                                                              |                                                                          |                                                                             |                                                                                    |                                                                                        |                             |         |                                                                                                             |                                                                                                                                |                            |                                                                                                                                                                                                                                                                                                                                                                                                                                   |
| Zhan, 2007 [17]                                            | Medicare beneficiaries 2002 to 2004 | Random                                                                                 | Gen Surg                                                     | Post-operative Deep Vein Thrombosis (DVT) and/or Pulmonary Embolism (PE) | 20,868 hospital discharges identified as surgical patients                  | 20,868 hospital discharges identified as surgical patients                         | Patient Safety Indicators                                                              | Field Defined               | Full    | ICD-9 CM codes                                                                                              | Medical record                                                                                                                 | Gold standard chart review | DVT/PE events flagged by ICD-9 CM codes were compared to those discovered by gold standard chart review. The sample studied was a random sample abstracted by the Medicare Patient Safety Monitor System.                                                                                                                                                                                                                         |
| Polancich 2006 [15]                                        | Unknown                             | Unknown                                                                                | Unknown                                                      | Hospital acquired decubitus ulcers                                       | not reported                                                                | 123 charts from list of patients identified through PSI as having decubitus ulcers | Patient Safety Indicators                                                              | Field Defined               | Full    | Administrative data, billing data, ICD-9 CM diagnosis codes, procedure codes                                | Medical Record                                                                                                                 | Gold Standard Chart Review | Study designed to test validity of Agency for Healthcare Research and Quality (AHRQ) PSIs for detecting hospital acquired decubitus ulcers. Only a sample of cases were manually reviewed.                                                                                                                                                                                                                                        |
| McDonald, 2002 [16]                                        | NA                                  | NA                                                                                     | NA                                                           | Adverse events                                                           | NA                                                                          | NA                                                                                 | Patient Safety Indicators                                                              | Field Defined               | Full    | Discharge summaries; ICD-9 codes                                                                            | NA                                                                                                                             | NA                         | Technical report providing detailed coding manual, including numerator, denominator, and ICD-9 codes for defining accepted, experimental, and rejected Patient Safety Indicators (PSIs). Several of the PSIs were derived from other harm detection methods. Report summarized validity information on PSIs, when this information was available from other studies.                                                              |
| <b>Multiple Detection Methods</b>                          |                                     |                                                                                        |                                                              |                                                                          |                                                                             |                                                                                    |                                                                                        |                             |         |                                                                                                             |                                                                                                                                |                            |                                                                                                                                                                                                                                                                                                                                                                                                                                   |
| Penz, 2007 [47]                                            | Adults 99 - 12/04                   | Sequential                                                                             | MICU, SICU and other (placement of Central Venous Catheters) | Adverse events related to central venous catheter placement              | 316 pt records                                                              | 40 patient records; 10 very low probability records and 30 high probability        | Computer algorithms and Natural Language Processing                                    | Natural Language Processing | Partial | Text records, daily progress notes, consultation notes, nursing notes, procedure notes, discharge summaries | Text records, daily progress notes, consultation notes, nursing notes, procedure notes, operative reports, discharge summaries | Gold standard chart review | Study compared two methods for semi-automated review of text records within the VA database using NLP (MedLEE) and a phrase matching algorithm (PMA). Reviewers instructed to use only the language of notes to determine if adverse event occurred. Methods limited by incomplete or inaccurate documentation, incomplete coding, spelling errors, sentence structure abbreviations. Time/technology intensive.                  |
| Weissman, 2007 [46]                                        | Adults 10/1/00 to 9/30/01           | Random                                                                                 | Acute medical and surgical                                   | Adverse event                                                            | 24,676; includes 6,841 pos. screens and 17,835 neg. screens                 | NA                                                                                 | Complications Screening Program, Patient Safety Indicators, and Bates 1995 methodology | Field Defined               | Partial | Medical record; billing data; ICD-9 codes                                                                   | NA                                                                                                                             | NA                         | Screens identified by a combination of Complications Screening Program, Patient Safety Indicators, and Bates 1995 <sup>26</sup> methods. Gold standard full chart review done on all positive screens and on 1990 negative screens (of 17,835 negative screens). Article focused on the relationship between adverse events and hospital workload. Compared adverse events across hospitals.                                      |
| <b>Other Automated Methodologies: Lab Signal Detection</b> |                                     |                                                                                        |                                                              |                                                                          |                                                                             |                                                                                    |                                                                                        |                             |         |                                                                                                             |                                                                                                                                |                            |                                                                                                                                                                                                                                                                                                                                                                                                                                   |
| Dormann, 2004 [26]                                         | Adults 6/97 - 12/97                 | Sequential                                                                             | Gastroenterology                                             | Adverse drug events                                                      | 474 admissions of 377 patients; 109 ADEs                                    | 474 admissions of 377 patients; 109 ADEs                                           | Automated lab signal detection                                                         | Field Defined               | Full    | Demographics, history, lab findings, diagnosis, and drugs                                                   | Medical record                                                                                                                 | Gold standard chart review | Used automated lab signals (ALS) and changes in ALS to identify ADEs. Automated system used to flag potential ADEs which were then sent as an alert to physicians. Use of delta ALS (change) resulted in improvement over Dormann, 2000 methodology.                                                                                                                                                                              |

|                                                                       |                               |                                                                             |                                                                                                                                   |                                                             |                                                          |                                                  |                                                                                      |               |                                                                |                                                                                                       |                                                                                                           |                                                                                                                              |                                                                                                                                                                                                                                                                                                                                                                                                                                                                          |
|-----------------------------------------------------------------------|-------------------------------|-----------------------------------------------------------------------------|-----------------------------------------------------------------------------------------------------------------------------------|-------------------------------------------------------------|----------------------------------------------------------|--------------------------------------------------|--------------------------------------------------------------------------------------|---------------|----------------------------------------------------------------|-------------------------------------------------------------------------------------------------------|-----------------------------------------------------------------------------------------------------------|------------------------------------------------------------------------------------------------------------------------------|--------------------------------------------------------------------------------------------------------------------------------------------------------------------------------------------------------------------------------------------------------------------------------------------------------------------------------------------------------------------------------------------------------------------------------------------------------------------------|
| Bagheri, 2000 [24]                                                    | Adults<br>6/97 - 10/97        | Sequential                                                                  | Gen med and other medical subspecialties                                                                                          | Adverse drug event: specifically drug induced liver injury. | 147 patients (156 ALT values, 159 AP)                    | Unknown                                          | Detection based on serum enzyme values                                               | Field Defined | Partial                                                        | Medical record, lab database, pharmacy database, demographics, social history (i.e. drug/alcohol use) | Voluntary reporting                                                                                       | voluntary reporting and stimulated voluntary reporting                                                                       | Prospective study from Toulouse, France to assess incidence/detection of drug induced biochemical liver abnormalities. Patients selected by automated computer screening of alanine aminotransferase (ALT) and alkaline phosphatase (AP) values in electronic lab database. Medical charts then reviewed to determine if this was ADE. Computerized detection compared to voluntary reporting from the same time period. Relatively easy, technologically simple method. |
| Dormann, 2000 [25]                                                    | Unknown                       | Sequential                                                                  | Gen Med                                                                                                                           | Adverse drug events                                         | 379 pts                                                  | Unknown                                          | Computer based monitoring of automatically generated lab signals and reports         | Field Defined | Partial                                                        | Lab database                                                                                          | Voluntary reporting                                                                                       | Stimulated voluntary report                                                                                                  | Automated identification of cases in a German hospital, followed by manual evaluation by clinical pharmacist and clinicians. Verified ADE matched to controls to assess costs and length of hospital stay issues.                                                                                                                                                                                                                                                        |
| Levy, 1999 [23]                                                       | All age groups<br>4/97 - 5/97 | Sequential                                                                  | Gen Med                                                                                                                           | Adverse drug events                                         | 199 admissions (192 patients)                            | 199 admissions                                   | Automated lab signal detection                                                       | Field Defined | Partial                                                        | Lab database                                                                                          | Lab database and clinical data                                                                            | Gold standard chart review                                                                                                   | Implementation of the pilot program described in Azaz-Livshits 1998 <sup>19</sup> . Computerized lab data monitored to detect ADEs using the same signals as the pilot study.                                                                                                                                                                                                                                                                                            |
| Azaz-Livshits, 1998 [22]                                              | All age groups<br>4/95-5/95   | Sequential                                                                  | Gen Med                                                                                                                           | Adverse drug events                                         | 153 admissions                                           | 153 admissions                                   | Automated lab signal detection                                                       | Field Defined | Partial                                                        | Lab database                                                                                          | Lab database and clinical data                                                                            | Gold standard chart review                                                                                                   | Pilot program to develop and assess computerized laboratory data as a detection tool for ADE in 34 bed medical ward in Jerusalem, Israel. Lab signals generated by computer, then verified by team. Limited computerized patient data at this hospital, however lab data was fully electronic. Generalizable to other institutions with limited electronic data (lab only). Cost of this system reasonable compared to costs of ADEs.                                    |
| <b>Other Automated Methodologies: ICD-9 or Billing Code Detection</b> |                               |                                                                             |                                                                                                                                   |                                                             |                                                          |                                                  |                                                                                      |               |                                                                |                                                                                                       |                                                                                                           |                                                                                                                              |                                                                                                                                                                                                                                                                                                                                                                                                                                                                          |
| Hougland, 2006 [30]                                                   | Adults<br>2001 calendar year  | Random and Flagged sample (from records with at least one flagged ADE code) | Unknown                                                                                                                           | Adverse drug events                                         | 3103 inpatients: 1961 random sample, 1142 flagged sample | Unknown                                          | Automated ICD-9 code strategy                                                        | Field Defined | Full: however review of flagged charts here for study purposes | ICD-9 CM codes                                                                                        | Medical record                                                                                            | Gold standard chart review                                                                                                   | Expert panel identified 416 ICD-9 CM codes to represent ADEs (flagged ADEs). Then chart review performed to ascertain codes' ability to detect/identify ADE.                                                                                                                                                                                                                                                                                                             |
| Seeger, 1996 [29]                                                     | Unknown<br>7/91-6/94          | Sequential                                                                  | Unknown                                                                                                                           | Adverse drug events                                         | 52,695 admissions                                        | 52,695 admissions                                | Capture-recapture method applied to automatic surveillance via medical record coding | Field Defined | Full                                                           | ICD-9 CM codes                                                                                        | Voluntary reporting                                                                                       | Voluntary reporting                                                                                                          | ICD-9 CM codes indicative of 7 categories of ADRs used to scan patient database at University of Illinois at Chicago Medical Center to identify ADRs (electronic sample). Capture-recapture assumed all subgroups within population have equal chance of being captured each time.                                                                                                                                                                                       |
| Hirschhorn, 1993 [28]                                                 | Adults<br>4/15/87 to 10/1/89  | Sequential                                                                  | Obstetrics (Women with nonrepeat, nonelective cesarean sections and perioperative prophylaxis with cefazolin or ceftioxin alone.) | Infection                                                   | 2,197 women                                              | 457 records (Randomly selected from full sample) | Screen for infection based on ICD-9 codes and antibiotic exposure                    | Field Defined | Full                                                           | Pharmacy database and ICD-9 codes                                                                     | Medical record and anesthesia records                                                                     | Chart review, not otherwise specified                                                                                        | Tool specifically detected cases of cesarean section infection using ICD-9-CM codes and parenteral postoperative antibiotic (PPA) exposure. Performance of indicators depended on accuracy of coded discharge diagnoses and automated pharmacy records. ICD-9 and infection codes listed in the appendix.                                                                                                                                                                |
| Roos, 1985 [27]                                                       | Adults<br>1976                | Sequential                                                                  | Readmissions following hysterectomy, cholecystectomy, and prostatectomy                                                           | Surgical complications                                      | Hyst: 387; Chol: 695; Prost: 488                         | Hyst: 387; Chol: 695; Prost: 488                 | Claims review                                                                        | Field Defined | Full                                                           | ICD-9 and ICDA-8 diagnostic codes                                                                     | Claims data (service use) and diagnoses. Additional information provided on about 20 cases per procedure. | 2 independent physician specialists rated data; met to resolve discrepancies. Only those events with agreement were included | Computer algorithm developed on 1974 Manitoba surgical claims database, revised on 1975 data, and tested on 1976 data. Used 3 or 4 digit ICDA-8 codes in first readmission after surgery for up to a 2 year period. Focused only on readmissions following hysterectomy, cholecystectomy, prostatectomy. Appendix lists of ICD-9 and ICDA-8 codes with appropriate timeframe of reference for different complications.                                                   |
| <b>Other Automated Methodologies: Other Automated Triggers</b>        |                               |                                                                             |                                                                                                                                   |                                                             |                                                          |                                                  |                                                                                      |               |                                                                |                                                                                                       |                                                                                                           |                                                                                                                              |                                                                                                                                                                                                                                                                                                                                                                                                                                                                          |

|                      |                                       |            |                                      |                     |                                                              |                                                       |                                                                                                  |               |         |                                                                                     |                                        |                                       |                                                                                                                                                                                                                                                                                                                                                                                                                                                                                                                                                                                                                                            |
|----------------------|---------------------------------------|------------|--------------------------------------|---------------------|--------------------------------------------------------------|-------------------------------------------------------|--------------------------------------------------------------------------------------------------|---------------|---------|-------------------------------------------------------------------------------------|----------------------------------------|---------------------------------------|--------------------------------------------------------------------------------------------------------------------------------------------------------------------------------------------------------------------------------------------------------------------------------------------------------------------------------------------------------------------------------------------------------------------------------------------------------------------------------------------------------------------------------------------------------------------------------------------------------------------------------------------|
| Ferranti, 2008 [50]  | Pediatric 12/1/04-1/31/06             | Sequential | PICU, Gen Med, Transitional Care     | Adverse drug events | 4,711 admissions (51,046 patient-service days)               | 4,711 admissions (51,046 patient-service days)        | Automated triggers: abnormal lab values, antidote administration, drug-lab combination triggers. | Field Defined | Partial | Lab database, pharmacy database.                                                    | Voluntary reporting                    | Voluntary reporting                   | Duke University Hospital evaluation of ADE detected by computerized surveillance versus voluntary reporting system. Voluntary reporting ADE rate = 1.8 events per 1000 patient days versus 1.6 events per 1000 patient days for automated method. (No statistical difference between methods). Authors postulate the reason automated surveillance fails to outperform voluntary reporting in this specific pediatric population is that the automated triggers need to be refined and tailored to better match pediatric situations.                                                                                                      |
| Bellini, 2007 [41]   | Adults 2 year period. Date not stated | Sequential | MICU, SICU, Gen Med, Gen Surg        | Infection           | 669 cases of a positive blood culture                        | 669 cases of a positive blood culture                 | Unnamed system with similarities to the CDC's NISS method                                        | Field Defined | Full    | Microbiological data, administrative data (patient ID, ward, and date of admission) | Medical record                         | Chart review, not otherwise specified | Identified new bacteremia cases as community-acquired or nosocomial (catheter related and other origins). Lausanne, Switzerland. Automated method similar to Center for Disease Control's Nosocomial Infection Surveillance System (NISS), but differed in two ways: a) did not separate blood stream infections (BSIs) that were documented microbiologically versus clinical sepsis without microbiological documentation, b) focused on catheter related infection versus other sites, instead of excluding bacteremia related to other (non-catheter) sites. Method used data available in most health care electronic record systems. |
| Kilbridge, 2006 [37] | Unknown 3/1/05 - 10/31/05             | Sequential | Unknown                              | Adverse drug events | 25,177 patients at univ hospital, 8029 pts at community hosp | Unknown                                               | Automated triggers                                                                               | Field Defined | Partial | Lab database, pharmacy database, demographic data                                   | Voluntary reporting                    | voluntary reporting                   | Comparison of ADE rates and nature between academic center and community setting using methods reported in Kilbridge, 2006 <sup>36</sup> . Pharmacist and physician chart reviewers.                                                                                                                                                                                                                                                                                                                                                                                                                                                       |
| Kilbridge, 2006 [38] | Unknown 3/05-4/05                     | Sequential | Unknown                              | Adverse drug events | 6940 pts                                                     | Unknown                                               | Automated triggers                                                                               | Field Defined | Partial | Lab database, pharmacy database, demographic data                                   | Voluntary reporting                    | voluntary reporting                   | Duke University Hospital. Detection of ADEs by automated trigger signals derived from various lab abnormalities, physician orders etc. Daily list of triggers evaluated by 2 pharmacists and weekly reviewed by physician. Automated rules derived and modified from HELP studies. Specialized resources involved, and 30 person hours per week. Programming resources considerable, perhaps not widely available.                                                                                                                                                                                                                         |
| Pokorny 2006 [39]    | Adults 4/15/99-6/30/02                | Sequential | ICU - general                        | Infection           | 1043 patients                                                | 194 pts in ENVIN-UCI project from 99-02 (see methods) | Computer surveillance                                                                            | Field Defined | Unknown | Lab database, pharmacy database, administrative data, diagnoses data                | Medical record, bedside clinical data. | Other: "bedside data collection"      | Retrospective analysis comparing computer based surveillance using three nosocomial infection (NI) suspicion criteria (positive microbiology, antibiotic administration, clinical diagnosis infection) with rates of infection obtained from prospective incidence study done over the same period (ENVIN - UCI) which consisted of bedside collection of data on ICU infections. NI classified according to international definitions, onset > 48 hrs after admission.                                                                                                                                                                    |
| Szekendi, 2006 [40]  | Adults 6/03 to 9/03                   | Sequential | All units, except pediatric and NICU | Adverse event       | 327 medical records; 493 trigger events                      | NA                                                    | Automated trigger tools                                                                          | Field Defined | Partial | Lab database and pharmacy database                                                  | NA                                     | NA                                    | Automated identification of charts with trigger tool (using 21 electronic triggers), followed by a manual review by a nurse and pharmacist (followed by additional physician review if no agreement). All records with 2 or more triggers were selected, followed by cases with triggers from medical list, abnormal lab list, and positive blood culture selected on a sequential rotating basis. Time: 35 minutes/chart not requiring physician review; 45 minutes/chart if physician review required.                                                                                                                                   |

|                     |                      |                                                                        |                                     |                                                                                               |                                                                                                     |                                                                                                                             |                                                    |                                                                  |                                                                                          |                                                                                |                                          |                                                                |                                                                                                                                                                                                                                                                                                                                                                                                                                                                                                                                                                                                                                                                                                 |
|---------------------|----------------------|------------------------------------------------------------------------|-------------------------------------|-----------------------------------------------------------------------------------------------|-----------------------------------------------------------------------------------------------------|-----------------------------------------------------------------------------------------------------------------------------|----------------------------------------------------|------------------------------------------------------------------|------------------------------------------------------------------------------------------|--------------------------------------------------------------------------------|------------------------------------------|----------------------------------------------------------------|-------------------------------------------------------------------------------------------------------------------------------------------------------------------------------------------------------------------------------------------------------------------------------------------------------------------------------------------------------------------------------------------------------------------------------------------------------------------------------------------------------------------------------------------------------------------------------------------------------------------------------------------------------------------------------------------------|
| Forster, 2005 [34]  | Adults fiscal 2002   | Random                                                                 | Gen Med, Gen Surg                   | Adverse event                                                                                 | 245 patients                                                                                        | 245 patients                                                                                                                | Computerized screen for trigger words in free text | Natural Language Processing                                      | Partial                                                                                  | Discharge summaries                                                            | Discharge summaries                      | Gold standard chart review                                     | Substudy of Ottawa Hospital Patient Safety study. Automated adverse event lexicon made up of 104 terms used by Murff 2003 <sup>31</sup> . Computerized search engine scanned discharge summaries (dtsearch desktop) and detected charts with potential harm, which were then reviewed by MD. Specificity found to be higher for nonelective admissions and discharge summaries dictated by residents and staff versus medical students. Automated detection reduced physician time by one-fifth.                                                                                                                                                                                                |
| Hartis, 2005 [35]   | Unknown 7/02 - 12/03 | Sequential                                                             | Unknown                             | Adverse drug event: specifically warfarin associated.                                         | 1,952 inpatient beds from 6 community hospitals                                                     | NA                                                                                                                          | Automated triggers                                 | Field Defined                                                    | Partial                                                                                  | Lab database, pharmacy database                                                | NA                                       | NA                                                             | Automated triggers developed to detect warfarin associated ADE. Automated triggers are INR > 3.0 and pharmacy orders for Vitamin K. Pharmacist reviewed triggers monthly. Interventions made when trigger confirmed, (i.e. education and therapy change). Goal of study is to assess ADE rates pre and post interventions.                                                                                                                                                                                                                                                                                                                                                                      |
| McIntosh, 2005 [36] | Unknown 2003 January | Sequential: all tracer drugs dispensed during time period              | Unknown                             | Adverse drug events                                                                           | 775 tracer drugs ordered from Automatic Dispensing Units (ADU)                                      | Unknown                                                                                                                     | Computerized data from automated dispensing units  | Field Defined                                                    | Partial                                                                                  | other: ADU                                                                     | not specified                            | Chart review, not otherwise specified, and voluntary reporting | Miami Veterans Affairs Medical Center study to determine if monitoring the removal of tracer drugs (such as naloxone) from ADU improves ADE reporting. Investigator reviews charts from ADU generated list. Upon removal of tracer drug, ADU prompts reply to the question "is medication ordered due to ADR/allergy". If the answer is yes, then chart reviewed to determine ADE. Automated surveillance data as reliable as answers to questions prompted by ADU - thus education of nurses and other staff is key.                                                                                                                                                                           |
| Murff, 2003 [33]    | Adults 1/1/00-7/00   | Random (424) and sequential (all remaining admissions during study pd) | Gen Med and Medicine subspecialties | Adverse drug events, adverse events, other: diagnostic errors, operative complications, falls | Cohort 1: 424 randomly selected admissions<br>Cohort 2: 2826 remaining admissions over study period | 295 of cohort 1 and 145 of cohort 2 via complex sampling/sub sampling and manual review process (see Reference for details) | Computerized screen for trigger words in free text | Natural Language Processing (Keyword triggers within free text). | Full (goal is a fully automated system, manual review of subsamples performed for study. | Discharge summaries                                                            | Medical record (not otherwise specified) | Gold standard chart review                                     | Brigham and Women's Hospital, using Brigham Integrated Computer system. Computerized screening tool searched free text discharge summaries for trigger words indicating possible adverse events. List of automated trigger words compiled using Harvard Medical Practice Study definitions as base. Electronic method alone versus electronic plus manual review compared for 2 cohorts. Computerized screen searches for programmed key words (not as sophisticated as natural language processing programs that "read" free text). Reviewers blinded to whether screening tool had identified the admission. Complex sampling/subsampling methods plus manual review process for each cohort. |
| Jha, 1998 [32]      | Adults 10/94-5/95    | Sequential                                                             | MICU, SICU, Gen Med, Gen Surg       | Adverse drug events                                                                           | 21,964 patient-days                                                                                 | 21,964 patient-days                                                                                                         | Automated triggers                                 | Field Defined                                                    | Partial                                                                                  | Medical record                                                                 | Medical record                           | Gold standard chart review and stimulated voluntary report     | Study of computer based ADE identification using modified Classen 1991 <sup>8</sup> (HELP) rules to create automated triggers with which the electronic record was screened. Rules modified during the study to increase PPV, and new rules created. Trained reviewer and physician were blinded to detection method. 11 person-hours per week for automated method versus 55 for chart review and 5 for voluntary reporting.                                                                                                                                                                                                                                                                   |
| Whipple, 1994 [31]  | Unknown              | Sequential                                                             | Unknown                             | Adverse drug events - specifically Patient Controlled Anesthesia (PCA) related overdose       | 4669 patients who received PCA                                                                      | 4669 patients who received PCA                                                                                              | Computerized search strategy                       | Field Defined                                                    | Partial                                                                                  | Billing data, clinical admission data, transfer, discharge and death databases | Voluntary reporting                      | voluntary reporting                                            | Retrospective computerized data retrieval study to identify ADE related to PCA use. First identified applicable billing codes for overdose, plus patients who had other evidence for overdose (i.e. ICU transfer etc). Charts with possible overdose then reviewed manually. Study used hospital's current computer system as they did not have funds for a new computer or computer programs, thus this technology could be generalizable.                                                                                                                                                                                                                                                     |

| Other Automated Methodologies: Specific Named Programs |                                                                  |            |                         |                                                                                |                                                                      |                                                                          |                                                                                                                     |               |         |                                                                  |                                                                 |                                                                                                                                                                       |                                                                                                                                                                                                                                                                                                                                                                                                                                                                      |
|--------------------------------------------------------|------------------------------------------------------------------|------------|-------------------------|--------------------------------------------------------------------------------|----------------------------------------------------------------------|--------------------------------------------------------------------------|---------------------------------------------------------------------------------------------------------------------|---------------|---------|------------------------------------------------------------------|-----------------------------------------------------------------|-----------------------------------------------------------------------------------------------------------------------------------------------------------------------|----------------------------------------------------------------------------------------------------------------------------------------------------------------------------------------------------------------------------------------------------------------------------------------------------------------------------------------------------------------------------------------------------------------------------------------------------------------------|
| Seger, 2007 [45]                                       | Adults<br>7/1/02 to<br>12/31/02                                  | Sequential | Gen Med and<br>Gen Surg | Adverse drug<br>events                                                         | 3,428<br>patients, of<br>which 215 had<br>high or critical<br>alerts | 56 charts; 48<br>unique<br>patients                                      | Dynamic<br>Pharmaco-<br>Monitoring System                                                                           | Field Defined | Partial | Lab database,<br>pharmacy<br>database, and<br>demographics       | Medical record                                                  | Chart review, not<br>otherwise specified                                                                                                                              | Dynamic Pharmaco-monitoring system identified critical, high, medium, and low alerts. This method focused on the critical and high alerts only. Separately identified preventable and non-preventable ADE. Provides a rough estimate of cost and time required (1.5 hours/day of pharmacist time - results in expected cost savings of \$49,000 in first year).                                                                                                      |
| Brossette, 2006 [44]                                   | Unknown<br>12/1/03 to<br>12/3/03<br>and<br>4/26/04 to<br>4/29/04 | Sequential | Unknown                 | Infection                                                                      | 907                                                                  | 907                                                                      | Nosocomial<br>Infection Marker<br>(NIM)                                                                             | Field Defined | Full    | Multiple sources:<br>Medical record; Lab<br>database             | Medical record                                                  | Gold standard chart<br>review                                                                                                                                         | Nosocomial Infection Marker (NIM) program by Med Mined, Birmingham, AL. Took about 10 minutes/week to maintain. Total time for NIM: 2 hours/10,000 admissions, compared to medical record review at 1.5 full time employees per 10,000 admissions)                                                                                                                                                                                                                   |
| Huang, 2005 [43]                                       | Unknown<br>1/1/04-<br>12/41/04                                   | Sequential | Unknown                 | Adverse drug<br>event:<br>specifically<br>hyperkalemia<br>on<br>spironolactone | 3995 pts on<br>spironolactone                                        | 662 pts on<br>spironolactone<br>sequentially<br>from 1/1/04 -<br>9/30/05 | Event Detector<br>automated event<br>detecting<br>computer program                                                  | Field Defined | Unknown | Lab database,<br>pharmacy database<br>(none others<br>specified) | Lab database,<br>pharmacy<br>database, none<br>others specified | Chart review, not<br>otherwise specified                                                                                                                              | Implementation of a new rule in an established automated event detection system (EventDetector) to monitor serum potassium in patients receiving spironolactone. Study encompassed 3 separate hospitals.                                                                                                                                                                                                                                                             |
| Graham, 2004 [42]                                      | Children<br>1/00 -<br>12/02                                      | Unknown    | NICU                    | Infection                                                                      | Unknown                                                              | Unknown                                                                  | NYARP (New<br>York Antimicrobial<br>Resistance<br>Project) electronic<br>monitoring of<br>bloodstream<br>infections | Field Defined | Full    | Microbiology data<br>for positive blood<br>cultures              | Medical record,<br>prospective<br>evaluation by ICP             | Other: Prospective<br>surveillance study<br>"Staff hand hygiene<br>and nosocomial<br>infections in neonates"<br>by infection control<br>professional (see<br>methods) | Study designed to validate NYARP data by comparing with prospective surveillance by infection control professional (independent study over the time period march 2001 - Jan 2002.) The NYARP electronically monitors trends in nosocomial infections in 14 acute care hospitals via monitoring positive blood cultures. Not validated to other institutions or patient populations. NYARP limited to bacterial infections. Relatively low cost to maintain database. |
